# Supplementary material for: Modulation of luminescence properties of circularly polarized thermally activated delayed fluorescence molecules with axial chirality by donor engineering
Source: Royal Society of Chemistry journal article supplement (doi:10.1039/d4cp00341a), 2024-01-01
Supplement: d4cp00341a1.pdf [file d4cp00341a1.pdf]

# Modulation of Luminescence Properties of Circularly Polarized Thermally Activated Delayed Fluorescence Molecules with Axial Chirality by Donor Engineering

Shulei Liu, Songsong Liu, Yang Gao, Lili Lin, Chuan-Kui Wang, Jianzhong Fan\*, Yuzhi Song\*

Shandong Province Key Laboratory of Medical Physics and Image Processing Technology, School of Physics and Electronics, Shandong Normal University, 250014 Jinan, China

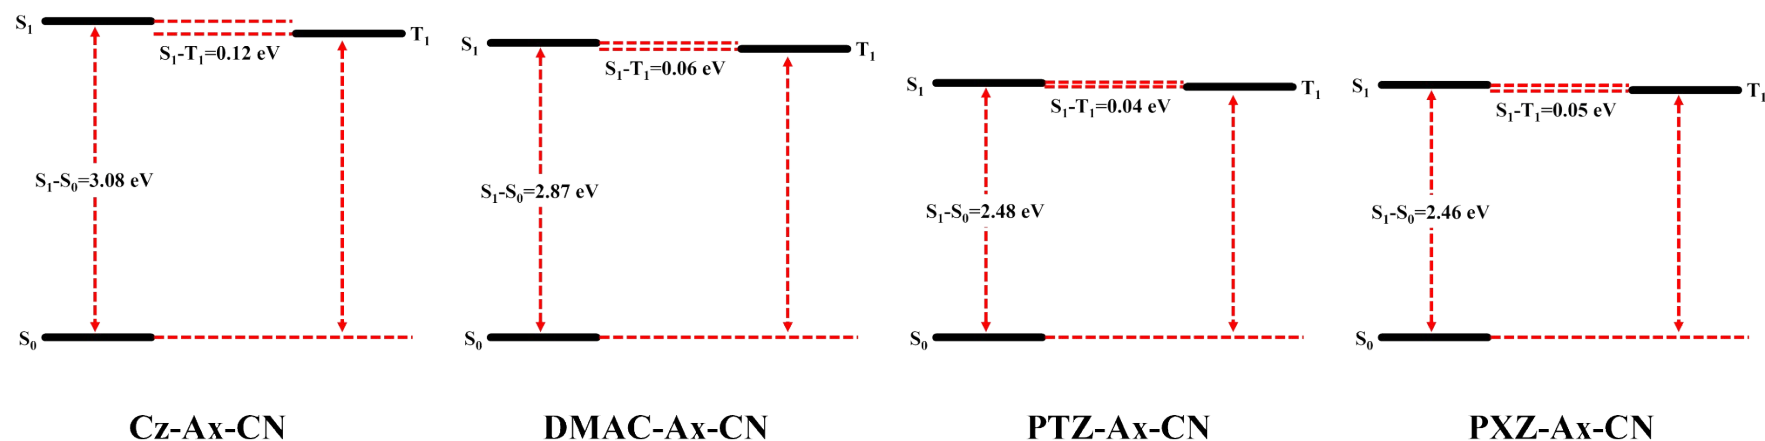

**Figure S1.** The energy levels of molecules of Cz-Ax-CN, DMAC-Ax-CN, PTZ-Ax-CN and PXZ-Ax-CN in toluene.

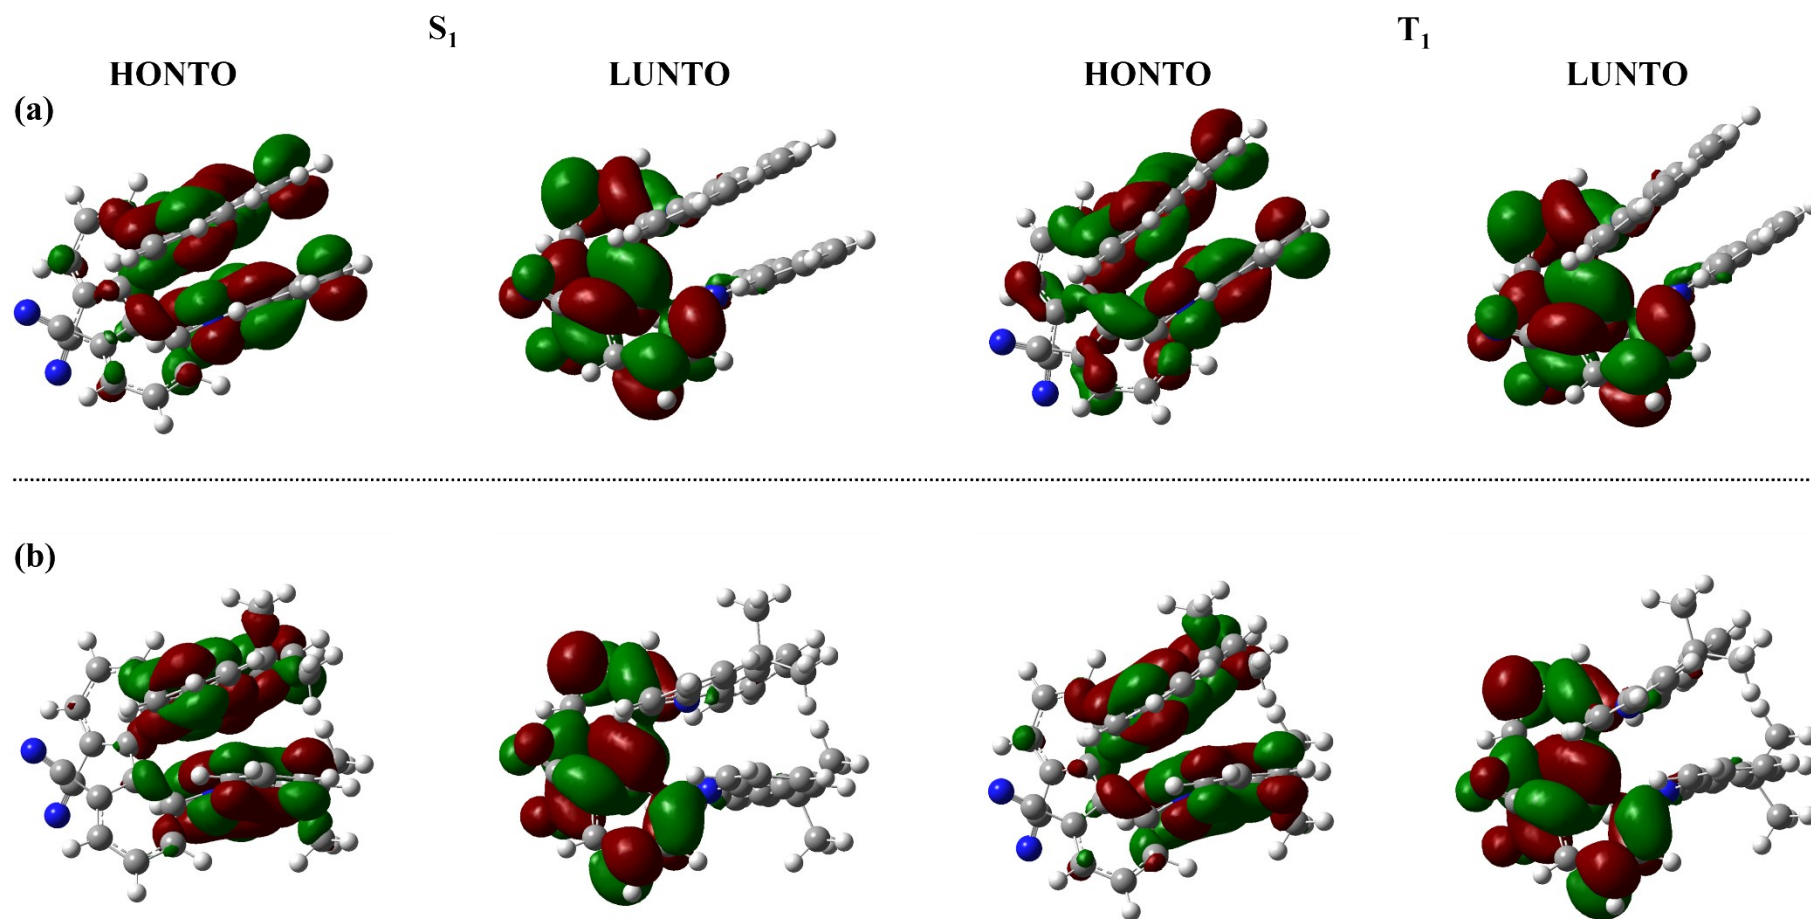

**Figure S2.** Natural transition orbitals (NTOs) of the  $S_1$  and  $T_1$  states for (a) Cz-Ax-CN and (b) DMAC-Ax-CN in toluene, respectively.

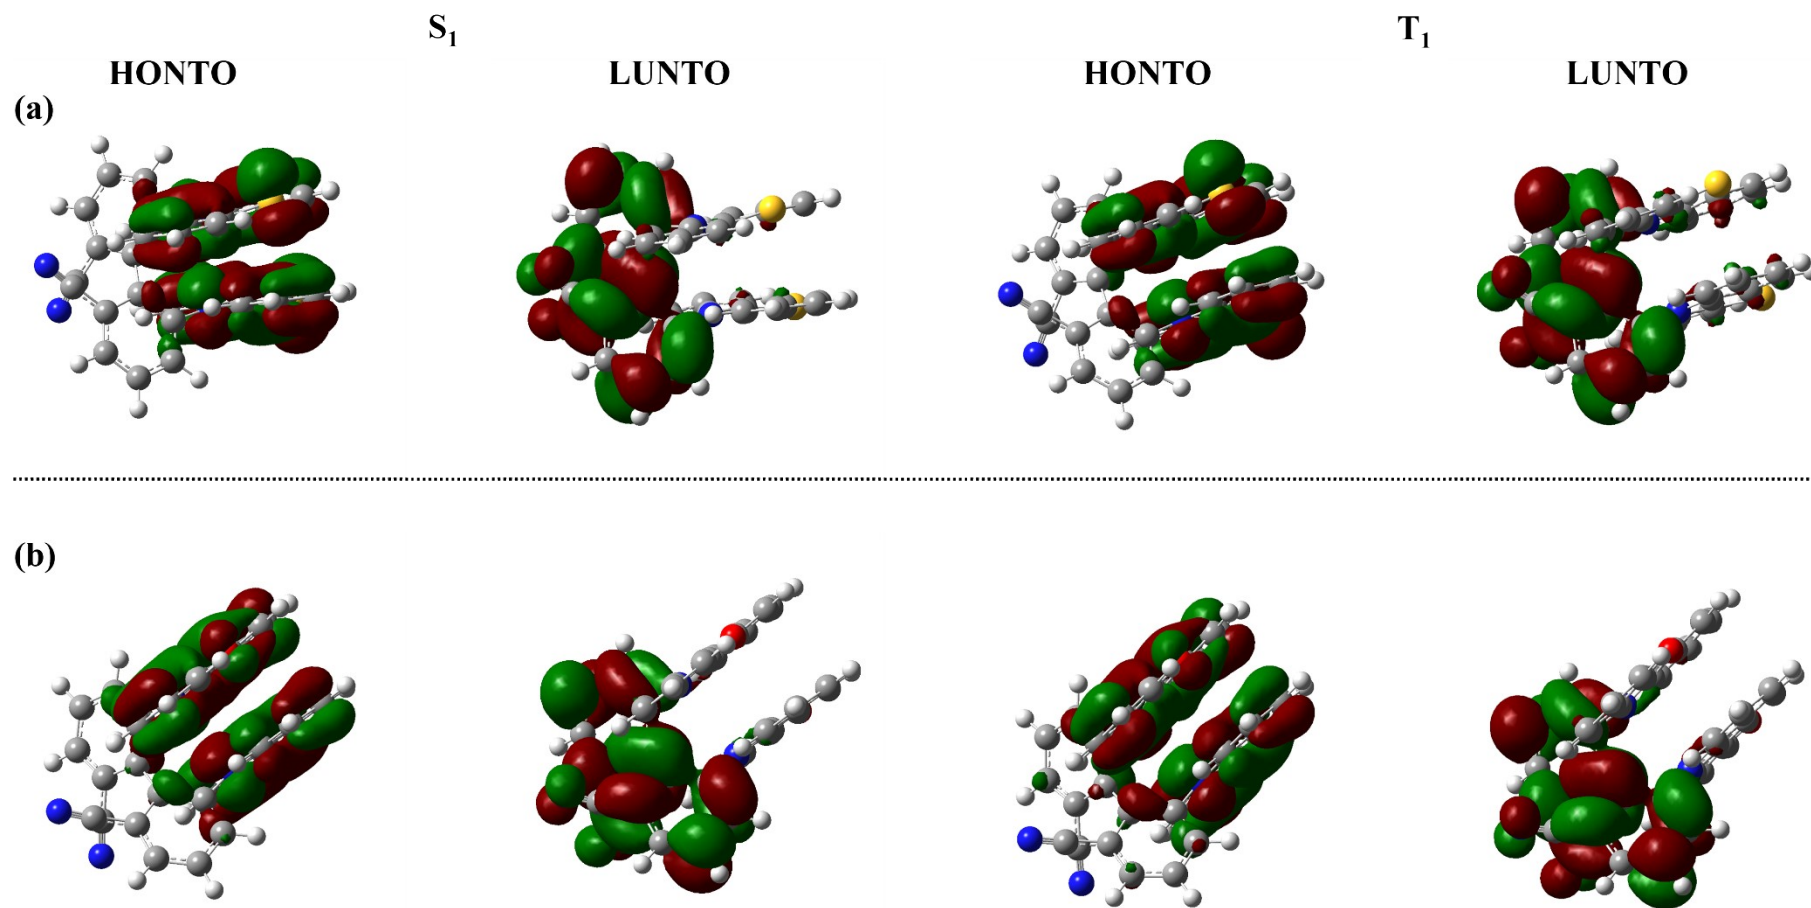

**Figure S3.** Natural transition orbitals (NTOs) of the  $S_1$  and  $T_1$  states for (a) PTZ-Ax-CN and (b) PXZ-Ax-CN in toluene, respectively.

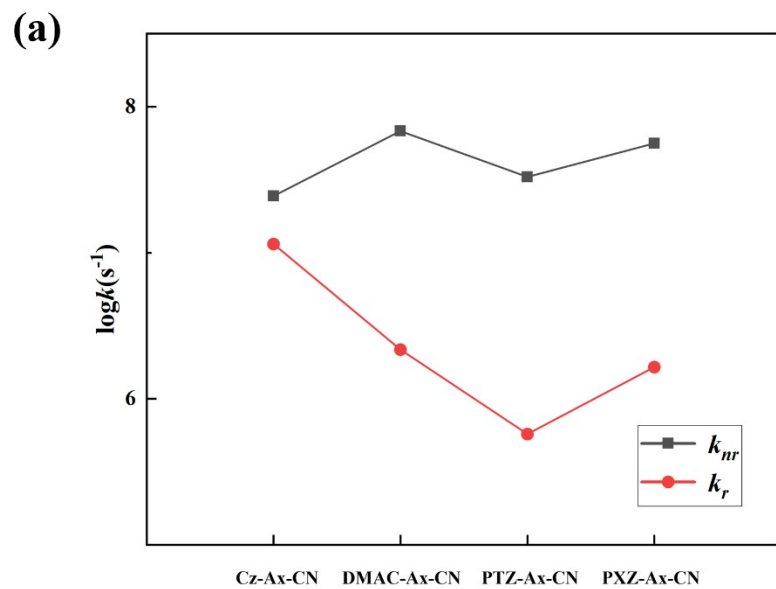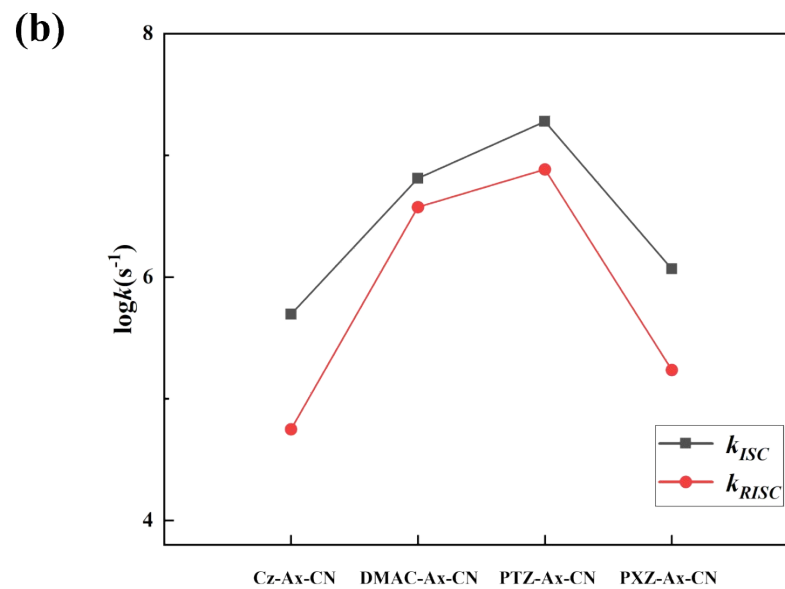

**Figure S4.** Rates constants of Radiative and Non-Radiative from  $S_1$  to  $S_0$  as well as the ISC and RISC rates between  $S_1$  and  $T_1$  for all studied molecules in toluene.

**Table S1.** The overlap and orbital energies of HOMO and LUMO are listed, the  $\epsilon_{\text{gap}}$  is the energy gap between the HOMO and LUMO.

|            | HOMO (eV) | LUMO (eV) | $\epsilon_{\text{gap}}$ (eV) | Overlap |
|------------|-----------|-----------|------------------------------|---------|
| Cz-Ax-CN   | -6.01     | -1.25     | 4.75                         | 28.31%  |
| DMAC-Ax-CN | -5.70     | -1.18     | 4.52                         | 26.43%  |
| PTZ-Ax-CN  | -5.48     | -1.31     | 4.18                         | 25.58%  |
| PXZ-Ax-CN  | -5.46     | -1.24     | 4.23                         | 25.60%  |

**Table S2.** The data of absorption asymmetry factor ( $g_{\text{abs}}$ ) for Cz-Ax-CN, DMAC-Ax-CN, PTZ-Ax-CN and PXZ-Ax-CN in toluene.

|            | $ \mu $ ( $\times 10^{-18}$ esu·cm) | $ m $ ( $\times 10^{-20}$ erg·G <sup>-1</sup> ) | $\cos \theta$ | $g_{\text{abs}}$ ( $\times 10^{-2}$ ) |
|------------|-------------------------------------|-------------------------------------------------|---------------|---------------------------------------|
| Cz-Ax-CN   | 1.450                               | 0.532                                           | -1            | -1.47                                 |
| DMAC-Ax-CN | 1.108                               | 0.190                                           | -1            | -6.87                                 |
| PTZ-Ax-CN  | 0.703                               | 0.392                                           | -1            | -2.23                                 |
| PXZ-Ax-CN  | 0.980                               | 0.296                                           | -1            | -1.21                                 |
